# Supplementary material for: Optimisation of plutonium separations using TEVA cartridges and ICP-MS/MS analysis for applicability to large-scale studies in tropical soils
Source: Royal Society of Chemistry journal article supplement (doi:10.1039/d3ay01030a), 2023-01-01
Supplement: d3ay01030a1.pdf [file d3ay01030a1.pdf]

## Supplementary

Supplementary table 1 – Typical operating condition of Agilent 8900 ICP-MS/MS for the analysis of Pu isotopes using O<sub>2</sub> gas

| Parameter                         | Typical operating conditions                                                                                                                                                                                                                                                                                                  |
|-----------------------------------|-------------------------------------------------------------------------------------------------------------------------------------------------------------------------------------------------------------------------------------------------------------------------------------------------------------------------------|
| Forward power                     | 1550 W                                                                                                                                                                                                                                                                                                                        |
| Reflected power                   | <20 W                                                                                                                                                                                                                                                                                                                         |
| Plasma gas                        | 15 l min <sup>-1</sup>                                                                                                                                                                                                                                                                                                        |
| Auxiliary gas flow                | 0.9 l min <sup>-1</sup>                                                                                                                                                                                                                                                                                                       |
| Nebuliser carrier gas flow        | 1.0 l min <sup>-1</sup>                                                                                                                                                                                                                                                                                                       |
| Nebuliser make up gas flow        | 0.25 l min <sup>-1</sup>                                                                                                                                                                                                                                                                                                      |
| Cooling water temperature         | 15-40 °C                                                                                                                                                                                                                                                                                                                      |
| Cooling water minimum flow rate   | 5.0 l min <sup>-1</sup>                                                                                                                                                                                                                                                                                                       |
| Cooling water inlet pressure      | 230-400 kPa                                                                                                                                                                                                                                                                                                                   |
| Exhaust duct extraction flow rate | 4-6 m <sup>3</sup> min <sup>-1</sup>                                                                                                                                                                                                                                                                                          |
| O <sub>2</sub> gas                | 0.3 ml min <sup>-1</sup> (30%)                                                                                                                                                                                                                                                                                                |
| Environment Temperature           | 15-30°C <2°C change in 1 hr                                                                                                                                                                                                                                                                                                   |
| Acquisition time                  | 149 s                                                                                                                                                                                                                                                                                                                         |
| Integration time                  | 0.05 secs for <sup>193</sup> Ir (on mass), <sup>209</sup> IrO <sup>+</sup> (mass sift), <sup>225</sup> IrO <sup>+</sup> (mass sift) and 0.2 secs for <sup>270</sup> UO <sup>+</sup> , <sup>271</sup> PuO <sup>+</sup> , <sup>272</sup> PuO <sup>+</sup> , <sup>273</sup> PuO <sup>+</sup> and <sup>274</sup> PuO <sup>+</sup> |
| Nebuliser                         | Glass Expansion concentric                                                                                                                                                                                                                                                                                                    |
| Spray chamber                     | Double pass                                                                                                                                                                                                                                                                                                                   |
| Spray chamber temperature         | 2°C                                                                                                                                                                                                                                                                                                                           |
| Spray chamber drain pump tubing   | PharMed tubing yellow/blue 1.52 mm                                                                                                                                                                                                                                                                                            |
| Mass range                        | 6 – 275 amu                                                                                                                                                                                                                                                                                                                   |
| Mode of acquisition               | Time Resolved Analysis                                                                                                                                                                                                                                                                                                        |
| Type of detector                  | Simultaneous                                                                                                                                                                                                                                                                                                                  |
| Detector mode                     | Pulse counting                                                                                                                                                                                                                                                                                                                |
| Total acquisition time            | 149 s                                                                                                                                                                                                                                                                                                                         |
| Sampling period                   | 1.18 s                                                                                                                                                                                                                                                                                                                        |
| Quaternary Pump stop time         | 120 s                                                                                                                                                                                                                                                                                                                         |
| Quaternary Pump post time         | 120 s                                                                                                                                                                                                                                                                                                                         |

| Isotope                | <sup>238</sup> U | <sup>239</sup> Pu | <sup>242</sup> Pu |
|------------------------|------------------|-------------------|-------------------|
| Sensitivity (cps / pg) | 1089             | 974               | 1197              |

---

kg<sup>-1</sup>)

---

Supplement  
ary table 2 -

*Sensitivity of measurement for isotopes <sup>238</sup>U, <sup>239</sup>Pu and <sup>242</sup>Pu using ICP-MS/MS*
